# Supplementary material for: Regulation of Plasmodium falciparum Glideosome Associated Protein 45 (PfGAP45) Phosphorylation
Source: PubMed Central journal article supplement (PMC3338798; doi:10.1371/journal.pone.0035855), 2012-04-27
Supplement: pone.0035855.s001.pdf [file pone.0035855.s001.pdf]

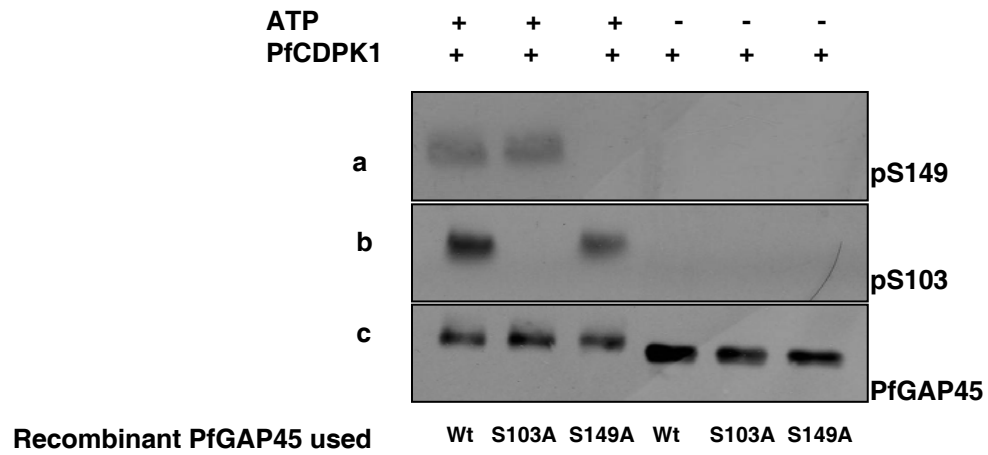

Phosphopeptides used for antisera

EPAHEE-*pS*-IYFTY (*S149*)

DLERS-*pS*-NDIYSES (*S103*)

Figure S1
