# Supplementary material for: Regulation of Plasmodium falciparum Glideosome Associated Protein 45 (PfGAP45) Phosphorylation
Source: PubMed Central journal article supplement (PMC3338798; doi:10.1371/journal.pone.0035855), 2012-04-27
Supplement: pone.0035855.s003.pdf [file pone.0035855.s003.pdf]

**A****Wt**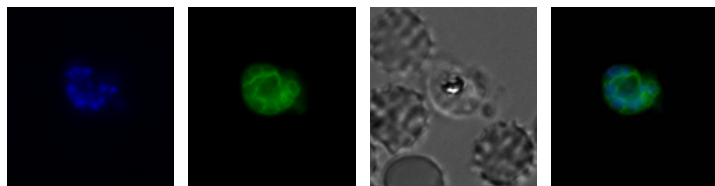**S89/103A**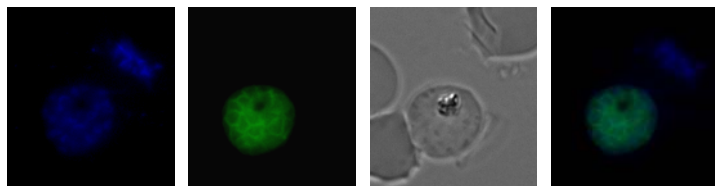**S89/103D**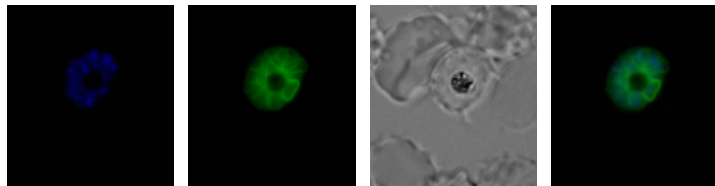**S149A**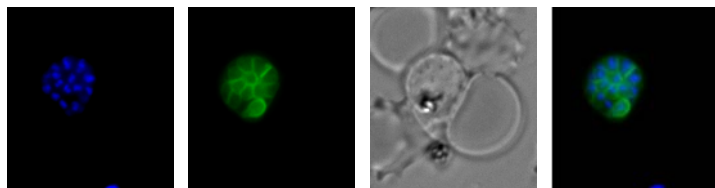**S149D**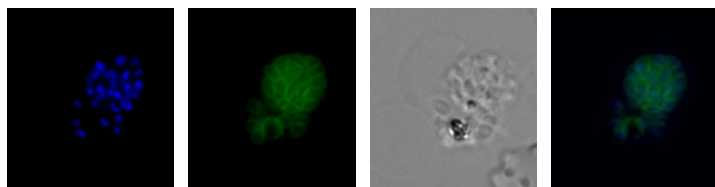**DAPI****GFP****DIC****Merge****B****DAPI****GAP45****MTIP****DIC****Merge**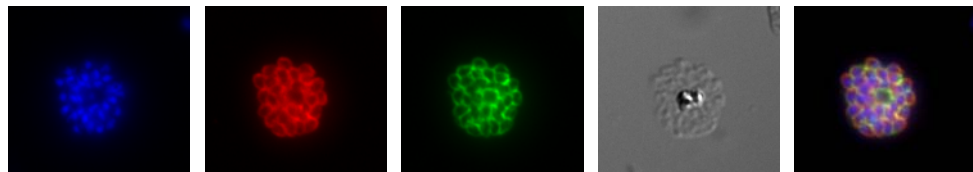**Figure S3**
