# Supplementary material for: Regulation of Plasmodium falciparum Glideosome Associated Protein 45 (PfGAP45) Phosphorylation
Source: PubMed Central journal article supplement (PMC3338798; doi:10.1371/journal.pone.0035855), 2012-04-27
Supplement: pone.0035855.s006.pdf [file pone.0035855.s006.pdf]

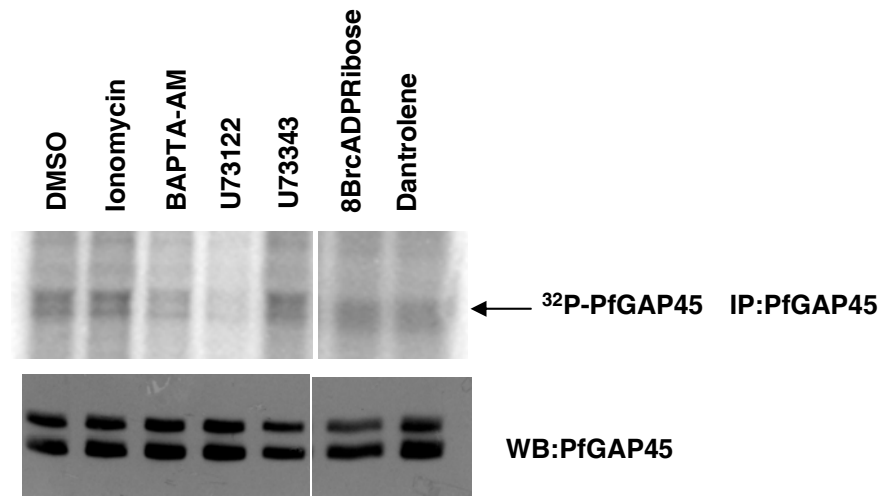

Figure S6
